# Supplementary material for: Massive PD-L1 and CD8 double positive TILs characterize an immunosuppressive microenvironment with high mutational burden in lung cancer
Source: HighWire-hosted journal article supplement (doi:10.1136/jitc-2021-002356), 2021-06-01
Supplement: jitc-2021-002356supp002_data_supplement.xlsx [file jitc-2021-002356supp002_data_supplement.xlsx]

## Sheet: Cohort A (328)
PID	Age	Gender	Smoking history	Pathological type	Clinical stage	EGFR	Treatment	PFS (Months)	PFS status	CD8 %	CD68 %	PDL1 TC %	PD1 %	CD163 %	CD8+PD1+ %	CD68+PD1+ %	CD68+CD163+ %	CD8+PDL1- %	CD8+PDL1+ %
P1	62	1	1	1	1	2	Chemotherapy	16	1	6.018	0.033	7	0.801	2.085	0.057	0	0.005	3.478	2.54
P2	70	2	2	1	4	1	Surgery	76.1	1	0.305	7.933	1	0	3.585	0	0	1.754	0.305	0
P3	66	1	2	1	1	2	Chemotherapy	21.2	1	6.167	0	100	0	3.084	0	0	0	3.084	3.084
P4	63	1	1	1	1	1	EGFR-TKIs	18.5333	1	6.197	0	0	0.413	0.03	0.059	0	0	5.754	0.443
P5	63	2	2	1	3	1	Surgery	36.1	1	1.111	0.007	6	0	1.766	0	0	0.007	1.089	0.022
P6	65	2	2	1	3	1	Surgery	33.1333	1	9.927	1.343	70	2.486	0.78	0.571	0.004	0.304	9.735	0.192
P7	80	1	1	1	1	2	Chemotherapy	14.5333	1	3.311	10.075	80	0.689	3.604	0.255	0.094	2.434	0.217	3.094
P8	78	1	1	1	1	2	Chemotherapy	6.66667	1	5.585	3.759	50	0.107	0.045	0.011	0	0.011	2.226	3.359
P9	56	1	1	1	1	2	Chemotherapy	5.76667	1	11.054	0	60	1.887	1.394	0.287	0	0	6.901	4.153
P10	52	2	2	1	1	1	EGFR-TKIs	6.03333	1	7.129	3.475	0	2.156	2.766	0.225	0.07	1.316	6.468	0.661
P11	55	1	1	1	3	2	Surgery	4.73333	1	2.357	9.9	5	0.367	0.733	0	0	0.314	1.257	1.1
P12	53	2	2	1	2	2	EGFR-TKIs	22.7333	1	0.073	0.649	3	0	1.731	0	0	0.236	0.073	0
P13	63	1	2	2	4	2	Surgery	39.1333	1	0.929	0.669	9	0.311	1.403	0.016	0.004	0.132	0.685	0.243
P14	63	1	1	2	1	2	Chemotherapy	15	1	0	3.534	0	0.043	6.182	0	0	2.821	0	0
P15	63	2	2	1	2	2	Chemotherapy	1.13333	1	2.862	2.262	0.5	2.862		0.046	0.139		2.862	0
P16	81	2	1	1	2	2	Chemotherapy	9.8	1	2.972	1.242	0.5	4.116	0	0.02	0	0	2.972	0
P17	64	1	2	1	1	2	Chemotherapy	27.3333	1	2.176	0.757	30	0	0.095	0	0	0	1.987	0.189
P18	67	2	1	1	1	1	EGFR-TKIs	8.86667	1	0.336	0.151	0	0.026	0.645	0	0	0.015	0.328	0.008
P19	53	2	2	1	3	1	Surgery	49.7333	1	4.553	0	0.5	0.012	0.767	0	0	0	4.517	0.037
P20	65	1	1	1	1	2	Chemotherapy	11.2667	1	6.525	1.354	0	3.412		0.651	0.018		6.507	0.018
P21	53	2	2	1	1	1	EGFR-TKIs	11.6333	1	4.496	0	0.5	0.016	0.016	0	0	0	4.496	0
P22	66	1	2	2	1	2	Chemotherapy	24	1	8.21	0.087	0.5	0	0.172	0	0	0	8.179	0.03
P23	55	2	2	1	2	2	Chemotherapy	40.0667	1	2.14	0	0	0	4.31	0	0	0	2.14	0
P24	67	1	1	1	1	2	Chemotherapy	8.8	1	3.599	0	0	0.962	0.286	0.076	0	0	3.352	0.248
P25	62	1	2	1	1	2	Chemotherapy	9.2	1	7.46	1.278	25	0.983	2.642	0.086	0	0.184	7.275	0.184
P26	66	1	1	1	2	2	Surgery	19.9333	1	6.151	3.566	0	0.814	1.12	0.163	0.005	0.631	5.426	0.725
P27	75	1	1	1	1	1	EGFR-TKIs	13.8667	1	0	0	10	0	0	0	0	0	0	0
P28	63	1	1	2	1	2	Chemotherapy	15.3667	1	1.304	0.313	0	0.235	0.287	0	0	0.052	1.2	0.104
P29	59	1	2	1	1	2	Chemotherapy	7.4	1	6.41	0.191	90	1.563	5.472	0.347	0	0.104	5.949	0.46
P30	56	2	2	1	2	2	Surgery+Chemotherapy	10.0333	1	10.962	11.322	20	4.797	2.207	0.648	0.144	0.36	8.347	2.615
P31	65	1	1	2	1	2	Chemotherapy	11.4333	1	3.425	3.327	0	1.761	0.294	0.294	0	0.098	3.131	0.294
P32	65	1	2	1	1	2	Chemotherapy	5.46667	1	0.946	0.946	0	0		0	0		0.946	0
P33	54	2	2	1	4	1	Surgery	29.7667	1	3.814	0.341	0	2.173	0.226	0.176	0.003	0	3.802	0.012
P34	66	1	1	1	1	2	Chemotherapy	9.73333	1	7.26	0.348	2	0.193	4.132	0.039	0	0.077	6.217	1.043
P35	50	1	1	2	2	2	Chemotherapy	23.5333	1	3.115	0	0	0.107	0	0.107	0	0	3.115	0
P36	62	2	2	1	1	1	EGFR-TKIs	5.23333	1	0.471	4.742	0.5	0.408		0	0.031		0.471	0
P37	62	1	1	1	1	1	EGFR-TKIs	5.7	1	5.12	4.244	0	4.143		0.326	0.185		5.11	0.01
P38	50	2	2	1	1	2	Chemotherapy	5.1	1	8.244	1.07	60	15.67		3.335	0.315		8.244	0
P39	67	1	1	2	3	2	Surgery	9.96667	1	1.711	0.359	0.5	4.762	0.171	0.384	0	0.006	1.711	0
P40	46	2	2	1	1	1	EGFR-TKIs	5.1	1	1.531	0.362	0	0.383		0	0		1.531	0
P41	50	2	2	1	4	1	Surgery	14.9667	1	5.02	0.777	0	1.072	2.081	0.093	0.006	0.064	4.944	0.075
P42	72	1	2	1	2	1	EGFR-TKIs	27.5	1	4.919	1.789	0	1.121	1.235	0.239	0.013	0.164	4.888	0.031
P43	62	1	2	1	3	2	Surgery	47.0667	1	6.13	0.076	0.5	0.042	0.358	0	0	0	5.997	0.133
P44	67	1	2	2	3	2	Surgery	92.9667	1	6.238	0.091	55	3.886	0.886	0.511	0.011	0	6.204	0.034
P45	63	2	2	1	1	2	Chemotherapy	5.8	1	1.174	1.1	0	0.409		0	0.223		0.304	0.87
P46	75	1	2	1	2	2	Surgery	12.5667	1	0.45	0.121	0.5	0.061	0.225	0	0	0.004	0.415	0.035
P47	39	2	2	1	2	1	Surgery	12.3	1	3.125	3.986	0.5	1.148	0.191	0.096	0.032	0	2.647	0.478
P48	83	2	2	1	1	1	EGFR-TKIs	4.36667	1	2.308	1.538	0	0.769		0	0		3.077	0
P49	66	1	1	1	2	2	Chemotherapy	22.8	1	0.846	2.306	0	0.785	0.319	0.074	0	0.012	0.834	0.012
P50	49	1	1	1	2	1	Surgery+EGFR-TKIs	11.0667	1	4.63	1.109	0.5	3.513	0.137	1.045	0.008	0.008	4.59	0.04
P51	56	2	2	1	1	1	EGFR-TKIs	4.66667	1	1.607	1.607	0.5	2.284		0	0.592		1.692	0
P52	60	1	2	1	1	2	Chemotherapy	6.43333	1	0.256	0.037	0	0.475	0.219	0	0	0	0.256	0
P53	63	2	2	1	2	1	Surgery+EGFR-TKIs	5.36667	1	1.724	1.844	0.5	3.408		0.025	0.022		1.687	0.036
P54	65	1	2	1	3	2	Surgery	4.4	1	5.021	1.852	0	3.003		0.183	0.284		5.021	0
P55	61	2	2	1	2	1	Surgery+EGFR-TKIs	7.1	1	10.097	1.769	0	4.647	0.703	1.747	0.011	0.055	10.086	0.011
P56	64	1	1	1	3	2	Surgery	76.7667	1	1.847	1.308	0	0.364	6.094	0	0.013	0	1.82	0.027
P57	65	1	1	1	2	1	EGFR-TKIs	8.26667	1	3.355	0.43	0	0.507	0.335	0.076	0	0	3.25	0.105
P58	58	1	1	1	3	2	Surgery	16.3	1	5.915	1.591	4	9.987	1.214	0.325	0.094	0.063	5.098	0.817
P59	49	1	1	1	1	2	Chemotherapy	18.6667	1	1.803	24.099	10	0.813		0	0.281		1.67	0.133
P60	65	1	1	1	1	2	Chemotherapy	3.83333	1	0.923	0.103	0.5	0.41	0.034	0	0	0	0.906	0.017
P61	69	2	2	1	1	2	Chemotherapy	6.63333	1	2.3	0.127	0.5	1.176	0.015	0.067	0	0	2.278	0.022
P62	69	2	2	1	2	1	EGFR-TKIs	28	1	3.333	1.827	0	0.432	1.088	0.028	0.014	0.112	3.319	0.014
P63	53	1	1	2	1	2	Chemotherapy	10.5	1	19.171	3.783	1	3.31	2.164	1.601	0.018	0.346	15.788	3.383
P64	67	1	1	1	1	1	EGFR-TKIs	3.46667	1	1.619	1.003	0	1.258		0.12	0.013		1.512	0.107
P65	80	2	1	1	2	2	Surgery	16.7	1	3.108	0.02	0	0.866	0.262	0.085	0	0	3.108	0
P66	53	1	2	1	2	1	Surgery+EGFR-TKIs	9.8	1	1.299	2.172	30	0.586	0.225	0.005	0	0.019	1.285	0.014
P67	50	2	2	1	4	1	Surgery	6.43333	1	1.563	1.555	0	7.759	2.298	0.483	0.046	0	1.386	0.176
P68	50	2	2	1	3	1	Surgery	7.8	1	0.432	0.391	0	0.067	0.432	0	0	0	0.432	0
P69	61	2	2	1	1	2	Chemotherapy	6.1	1	3.667	0.333	0	0	0	0	0	0	3.667	0
P70	62	1	1	1	2	2	Surgery+Chemotherapy	10.2333	1	5.482	0.399	0	2.677	0.163	0.173	0	0	5.354	0.128
P71	56	2	2	1	3	2	Surgery	5.23333	1	3.205	0.908	95	0.811	0	0.01	0	0	2.535	0.67
P72	65	1	2	1	1	2	Chemotherapy	8.06667	1	2.379	0.33	10	1.878	0.012	0.018	0	0	1.737	0.642
P73	66	1	1	1	1	1	EGFR-TKIs	12.9	1	8.71	0.108	5	3.011	0	0.108	0	0	8.495	0.215
P74	77	1	1	2	1	2	Chemotherapy	11.3667	1	0	0	0	0	0	0	0	0	0	0
P75	60	1	1	2	1	2	Chemotherapy	9.76667	1	0	0.443	0	10.052	0.079	0	0.016	0	0	0
P76	65	1	1	1	4	2	Surgery	47.4667	1	12.179	0	0	2.909	0	0.197	0	0	12.007	0.173
P77	63	1	2	1	3	1	Surgery	5.06667	1	2.763	0.176	7	4.741	0	0.157	0.018	0	2.671	0.092
P78	60	1	1	1	2	2	Chemotherapy	45.4	1	0.543	0.609	0	0.088	0	0	0	0	0.528	0.015
P79	64	2	2	1	1	1	EGFR-TKIs	4.66667	1	1.741	0.138	0.5	1.646	0.218	0.109	0	0	1.668	0.073
P80	58	1	1	1	1	2	Chemotherapy	9.66667	1	0	0	0	0	0	0	0	0	0	0
P81	61	1	2	1	4	1	Surgery	62.4333	1	2.784	0	0	0	0	0	0	0	2.784	0
P82	66	2	2	1	4	2	Surgery	15.9667	1	1.588	0.306	0	1.675	0.146	0.16	0	0	1.282	0.306
P83	56	1	1	1	1	2	Chemotherapy	12.2667	1	2.774	0.277	0	1.36	0.319	0.144	0	0	2.732	0.042
P84	60	2	2	1	1	1	EGFR-TKIs	17.9	1	3.553	0	0	0.508	0	0	0	0	3.553	0
P85	50	1	1	1	1	1	EGFR-TKIs	12.8333	1	1.197	0.025	0	0.127	0	0	0	0	1.187	0.01
P86	74	1	2	1	1	2	Chemotherapy	19.3	1	9.932	0.157	80	7.602	1.887	2.202	0	0	8.404	1.528
P87	74	1	1	1	3	2	Surgery	43.0333	1	2.622	0.025	0	0.65	0.005	0.163	0	0	2.617	0.005
P88	45	1	1	1	1	1	EGFR-TKIs	4.06667	1	2.258	0	0	1.255	0	0.063	0	0	2.258	0
P89	55	1	1	1	3	2	Surgery	15.1333	1	0.533	0.156	0	0.089	0.011	0	0	0	0.467	0.067
P90	82	1	2	1	1	2	Chemotherapy	9.9	1	2.899	3.624	0	0.095	0	0	0	0	2.238	0.662
P91	56	1	1	1	2	2	Chemotherapy	4.56667	1	12.595	0.094	90	6.186	0.076	0.339	0	0	10.769	1.826
P92	47	2	2	1	2	1	EGFR-TKIs	38.9667	1	1.85	0.145	0	0.913	0.004	0.058	0	0	1.797	0.054
P93	61	2	1	2	1	2	Chemotherapy	22.8333	1	3.81	0.076	95	0.786	0.291	0.023	0	0	2.266	1.544
P94	66	1	1	1	1	2	Chemotherapy	1.3	1	0.113	1.474	70	0.34	0.113	0	0	0	0.113	0
P95	50	2	2	1	1	1	EGFR-TKIs	4.6	1	4.378	59.908	3	1.382	0.806	0.23	0.691	0.691	2.074	2.304
P96	65	1	1	1	2	1	Surgery+EGFR-TKIs	63.4667	1	0.187	0.472	0	0.123	0.108	0.025	0.005	0.025	0.187	0
P97	72	2	1	1	4	2	Surgery	20.6667	1	2.153	76.517	0	0.978	0	0	0.391	0	1.761	0.391
P98	52	1	1	2	1	2	Chemotherapy	4.06667	1	0.636	4.326	0	0.891	0.254	0	0	0	0.509	0.127
P99	68	1	1	1	1	2	Chemotherapy	3.26667	1	5.429	1.538	60	5.309	8.607	2.402	0.18	1.189	3.724	1.706
P100	67	1	1	1	4	2	Surgery	11.1	1	0.02	0.572	0	0.256	0.079	0	0.039	0.039	0.02	0
P101	76	2	2	1	3	1	Surgery	53.7333	1	2.831	4.965	0.5	0.533	0.205	0	0	0.123	2.749	0.082
P102	53	1	2	1	1	2	Chemotherapy	5.5	1	0.302	4.385	3	0.387	1.495	0.008	0.023	0.875	0.217	0.085
P103	69	1	2	1	1	2	Chemotherapy	29.4	1	7.856	21.212	0	2.357	5.724	0.224	0	1.908	4.938	2.918
P104	66	1	1	1	1	2	Chemotherapy	4.1	1	10.323	4.516	0	0	0	0	0	0	9.677	0.645
P105	71	1	1	1	4	2	Surgery	46.5667	1	0	0	0	0	0	0	0	0	0	0
P106	72	2	2	1	1	1	EGFR-TKIs	3.86667	1	0.643	10.177	0	0.347	0.026	0.013	0.039	0.026	0.578	0.064
P107	65	1	1	2	1	1	EGFR-TKIs	12.2667	1	0	18.952	0	11.29	2.419	0	2.419	0.806	0	0
P108	63	1	1	1	1	2	Chemotherapy	11.0667	1	0.208	0.067	0.5	0.391	0.489	0.012	0	0.043	0.183	0.024
P109	67	1	1	1	1	2	Chemotherapy	17.7333	1	1.697	9.915	0.5	0.159	8.218	0	0	4.507	1.591	0.106
P110	56	1	1	1	1	2	Chemotherapy	5.3	1	0.476	3.699	0.5	2.492	1.127	0.127	0.175	0.46	0.476	0
P111	65	2	2	1	1	1	EGFR-TKIs	20.9667	1	1.074	1.206	0	0.103	0.015	0	0	0	0.824	0.25
P112	71	1	1	2	1	2	Chemotherapy	3.5	1	1.054	8.961	7	2.419	2.357	0.186	0.62	1.953	0.434	0.62
P113	68	1	1	2	3	2	Surgery	4.63333	1	2.259	10.575	0.5	0	0.205	0	0	0	1.848	0.411
P114	71	1	1	2	4	2	Surgery	2.86667	1	0.096	0.153	10	0.192	0.211	0.057	0	0	0.096	0
P115	77	1	1	1	1	2	Chemotherapy	19.1333	1	1.266	32.911	20	8.861	0	1.266	8.861	0	0	1.266
P116	54	2	2	1	1	1	EGFR-TKIs	10.0333	1	0.063	3.879	1	1.142	0.151	0	0.006	0.082	0.063	0
P117	67	1	1	2	1	2	Chemotherapy	4.86667	1	2.505	2.948	5	5.16	0.437	1.201	0.287	0.241	2.247	0.259
P118	69	1	1	1	1	2	Chemotherapy	28.4333	1	0	6.88	4	0.735	13.694	0	0	1.202	0	0
P119	64	2	2	1	2	2	Chemotherapy	47.7	1	0.061	1.562	0	2.267	0.368	0.061	0.031	0.123	0.061	0
P120	46	2	2	1	2	1	EGFR-TKIs	4.1	1	0	0.507	0	0.183	0.227	0	0	0.108	0	0
P121	67	1	1	1	1	2	Chemotherapy	3.4	1	2.647	2.681	50	1.244	3.472	0.566	0.034	0.441	0.543	2.104
P122	73	1	1	1	1	2	Chemotherapy	12.1333	1	0.146	7.44	0.5	1.007	1.765	0.015	0.058	0.948	0.146	0
P123	55	1	1	2	1	1	EGFR-TKIs	12.1	1	0.888	0.605	0.5	0.371	0.065	0.008	0.012	0.02	0.618	0.27
P124	52	1	2	1	2	1	EGFR-TKIs	36.7	1	2.258	1.062	0	0.266	0.93	0	0	0.266	1.859	0.398
P125	29	1	2	1	4	1	Surgery	2.46667	1	7.044	1.58	0.5	1.448	0.263	0.132	0	0.066	6.583	0.461
P126	65	2	2	1	1	1	EGFR-TKIs	27.8	1	6.201	0.008	2	5.288	2.925	0.407	0	0	6.185	0.016
P127	84	1	1	2	1	2	Chemotherapy	28.9	1	5.169	0	1	1.216	0.263	0.066	0	0	4.972	0.197
P128	44	1	1	1	4	1	Surgery	18.6	1	5.236	0.233	3	2.396	2.185	0.189	0	0.022	5.114	0.122
P129	60	2	2	1	2	2	Chemotherapy	25.6667	1	4.402	0.156	3	1.486	0.042	0.184	0	0	3.864	0.538
P130	72	1	1	2	1	2	Chemotherapy	24.4667	1	2.534	0.031	0.5	1.957	5.501	0.577	0.005	0.015	2.457	0.077
P131	67	1	1	2	1	2	Chemotherapy	10.7333	1	0.186	0	0	0.119	0.593	0	0	0	0.186	0
P132	56	1	1	1	3	1	Surgery	24.6667	1	10.243	0.434	0.5	2.886	5.479	0.498	0	0.026	9.246	0.996
P133	62	2	2	1	1	1	EGFR-TKIs	12.6	1	0.395	0	0	1.383	1.779	0	0	0	0.395	0
P134	55	1	1	2	1	2	Chemotherapy	10.0333	1	1.993	0.117	70	0.703	0.703	0	0	0	1.172	0.821
P135	60	1	1	1	1	2	Chemotherapy	14	1	3.265	0.052	0.5	0.486	1.494	0.026	0	0.026	2.614	0.651
P136	79	1	1	2	1	2	Chemotherapy	5.76667	1	4.524	0.119	30	1.071	0.476	0	0	0	3.929	0.595
P137	70	1	1	2	1	2	Chemotherapy	1.53333	1	0.545	0.909	0	0.545	0.182	0	0	0.091	0.455	0.091
P138	59	1	2	1	4	2	Surgery	7.23333	1	0.845	2.365	1	0.507	1.351	0	0	0	0.845	0
P139	60	2	2	1	3	1	Surgery	41	1	5.986	0.021	0	0.646	0.507	0.076	0	0	5.958	0.028
P140	68	1	1	2	1	2	Chemotherapy	5.7	1	1.332	0.031	40	1.008	1.02	0.202	0	0.004	0.825	0.506
P141	62	1	1	1	4	2	Surgery	9	1	18.839	8.859	0	17.006	2.546	4.481	2.953	0.407	18.839	0
P142	59	1	2	2	1	2	Chemotherapy	2.43333	1	2.901	0	0	0.458	0.458	0	0	0	2.901	0
P143	59	2	2	1	1	2	Chemotherapy	2.06667	1	3.705	0.017	5	1.16	0.876	0.058	0	0	3.621	0.083
P144	80	1	2	1	3	2	Surgery	28.6333	1	19.894	0	80	3.352	2.918	0.69	0	0	14.393	5.501
P145	55	1	1	1	2	2	Chemotherapy	6.36667	1	1.898	1.635	5	1.726	0.154	0.109	0.054	0.018	1.789	0.109
P146	61	2	2	1	1	1	EGFR-TKIs	7.6	1	30.859	0.081	0	0.783	0.675	0.135	0	0	30.859	0
P147	60	2	2	1	2	1	EGFR-TKIs	30.3	1	8.079	0	15	14.588	6.069	1.012	0	0	7.667	0.413
P148	44	1	1	1	1	2	Chemotherapy	3.46667	1	2.344	3.615	25	2.584	0.078	0.318	0.111	0.009	1.603	0.741
P149	68	1	2	2	1	2	Chemotherapy	9.53333	1	2.757	1.166	0.5	0.954	0	0.318	0.53	0	2.015	0.742
P150	62	1	1	1	1	2	Chemotherapy	1	1	0	0.221	25	0	0	0	0	0	0	0
P151	40	1	2	1	1	1	EGFR-TKIs	10.9	1	1.408	0.03	15	0.706	13.185	0.015	0	0	1.145	0.262
P152	56	1	1	1	1	1	EGFR-TKIs	6.46667	1	0.186	20.359	0	0.278	0.402	0	0.124	0.217	0.155	0.031
P153	49	2	2	1	2	2	Chemotherapy	5.7	1	7.966	2.458	0.5	8.398	5.712	0.635	0.03	0.533	7.397	0.569
P154	63	2	2	1	3	1	Surgery	0.666667	1	0.559	36.666	0.5	0.336	6.764	0.01	0.031	4.79	0.498	0.061
P155	65	2	2	1	3	2	Surgery	28.9	1	6.863	2.729	65	3.321	3.824	1.107	0.096	0.856	5.05	1.813
P156	55	1	1	2	1	2	Chemotherapy	5	1	0.209	80.126	1	0.837	0.418	0	0.418	0.418	0.209	0
P157	55	2	2	1	1	2	Chemotherapy	1.26667	1	4.247	62.828	15	1.664	3.386	0.038	0.574	2.487	2.908	1.339
P158	73	2	1	1	1	1	EGFR-TKIs	5.3	1	2.476	8.764	0.5	0.604	2.636	0.109	0.017	0.881	2.342	0.134
P159	54	2	2	1	2	1	EGFR-TKIs	12.6333	1	1.183	7.069	2	0.694	1.605	0.031	0.031	0.24	0.787	0.396
P160	68	1	1	2	1	2	Chemotherapy	7.13333	1	0.632	0.134	3	0.454	0.045	0.037	0	0.015	0.513	0.119
P161	69	1	1	2	2	2	Surgery+Chemotherapy	3.4	1	5.186	3.18	55	1.041	5.78	0.356	0.014	1.09	1.468	3.718
P162	40	2	1	1	1	1	EGFR-TKIs	24.6	1	3.632	0.094	0.5	0.393	0.629	0.031	0	0	3.506	0.126
P163	57	2	2	1	2	2	Chemotherapy	14.7	1	1.967	2.013	0	0.666	0.325	0.008	0.008	0.129	1.74	0.227
P164	66	2	1	1	1	1	EGFR-TKIs	2.33333	1	0.545	8.949	0	0.078	0.078	0	0.078	0	0.545	0
P165	56	1	2	1	1	2	Chemotherapy	7.3	1	2.021	1.5	1	0.74	0.302	0.042	0.01	0.042	1.698	0.323
P166	52	1	1	1	1	1	EGFR-TKIs	2.06667	1	1.75	3.852	0	0.736	0.886	0.06	0.023	0.323	1.524	0.225
P167	64	1	1	1	4	1	Surgery	28.8	1	1.247	0	2	0.564	0.667	0.011	0	0	1.243	0.004
P168	56	1	1	2	1	2	Chemotherapy	3.63333	1	0.813	2.413	0	0.303	0.29	0.003	0.007	0.132	0.803	0.01
P169	81	1	1	1	1	1	EGFR-TKIs	5.7	1	1.335	16.287	0.5	1.083	22.13	0.143	0.096	8.961	1.23	0.104
P170	65	2	2	1	2	1	EGFR-TKIs	29.6	1	2.063	1.811	0.5	1.123	2.464	0.08	0.023	0.493	2.063	0
P171	60	1	1	2	1	2	Chemotherapy	4.03333	1	0.852	2.2	20	0.213	0	0	0	0	0.284	0.568
P172	61	1	1	1	1	2	Chemotherapy	20.8667	1	0.327	0.976	5	0.148	0.808	0.005	0	0.066	0.271	0.056
P173	52	1	1	2	1	2	Chemotherapy	1	1	1.029	81.682	0.5	0.588	0.029	0	0.353	0.029	0.265	0.764
P174	56	1	2	1	1	2	Chemotherapy	16.7667	1	6.961	1.667	90	0.215	0.061	0.011	0	0	6.884	0.077
P175	52	2	2	1	1	1	EGFR-TKIs	7.53333	1	13.57	1.224	0	1.522	3.275	0.339	0	0.38	12.321	1.249
P176	60	1	1	1	1	2	Chemotherapy	9.03333	1	5.386	1.38	0.5	1.345	0.076	0.129	0.023	0.006	5.38	0.006
P177	72	2	2	1	1	2	Chemotherapy	22.3333	1	6.17	0.746	0.5	0.962	0.995	0.133	0	0	6.17	0
P178	80	1	2	2	1	2	Chemotherapy	7	1	9.559	0.668	0.5	0	0.067	0	0	0	9.559	0
P179	50	1	2	1	1	2	Chemotherapy	7.06667	1	0.5	0	0	0	0.3	0	0	0	0.5	0
P180	79	1	2	2	1	2	Chemotherapy	6.3	1	6.386	0.131	10	0.131	0.052	0	0	0	6.307	0.079
P181	56	1	1	2	1	2	Chemotherapy	35.7	1	2.186	0.062	50	0.021	0.11	0.003	0	0	1.922	0.265
P182	71	1	2	2	1	2	Chemotherapy	5.46667	1	2.839	0	0.5	0.801	2.585	0.473	0	0	2.767	0.073
P183	58	1	2	1	1	2	Chemotherapy	25.3667	1	2.763	0.012	10	0.335	0.049	0.037	0	0	2.763	0
P184	54	2	1	1	1	2	Chemotherapy	5	1	2.646	0.292	50	0.057	0.203	0.016	0	0	2.563	0.083
P185	54	1	2	1	2	2	Surgery+Chemotherapy	41	1	7.669	3.927	0.5	0.359	6.134	0.012	0.017	0.452	7.524	0.145
P186	55	1	2	1	1	2	Chemotherapy	16.9333	1	16.483	0.349	3	19.273	5.011	5.91	0.018	0.202	16.116	0.367
P187	60	1	2	2	1	2	Chemotherapy	5.23333	1	2.447	0.335	0	0.753	1.401	0.021	0	0.063	2.28	0.167
P188	60	1	2	1	1	1	EGFR-TKIs	6.26667	1	5.184	1.555	0	0.829	0	0.104	0	0	4.717	0.467
P189	62	1	2	2	1	2	Chemotherapy	22.3333	1	12.18	0.226	0	0.605	2.958	0.121	0	0.105	11.801	0.379
P190	76	2	2	1	1	2	Chemotherapy	25.3667	1	0	0	0.5	0	0	0	0	0	0	0
P191	61	2	2	1	1	2	Chemotherapy	6.1	1	4.097	0.559	1	1.49	0.466	0	0	0	4.097	0
P192	63	1	2	1	1	2	Chemotherapy	1.83333	1	13.755	0.163	0	0.07	3.923	0.023	0	0	13.755	0
P193	51	1	2	2	1	2	Chemotherapy	5.03333	1	0.392	0.062	20	0.037	0.18	0	0	0	0.344	0.048
P194	47	1	2	1	1	2	Chemotherapy	21.3333	1	1.415	0.137	0	0.084	0.153	0.023	0	0	1.312	0.103
P195	55	2	2	1	1	1	EGFR-TKIs	3.7	1	11.838	1.419	0	10.769	1.627	2.731	0.047	0.16	10.389	1.449
P196	63	2	2	1	1	2	Chemotherapy	8.8	1	6.638	0.214	70	0	0.714	0	0	0.071	4.711	1.927
P197	64	1	2	1	2	1	Surgery+EGFR-TKIs	52.5333	1	1.663	0.007	0.5	0.007	1.519	0	0	0	1.663	0
P198	54	1	2	2	1	2	Chemotherapy	25.3	1	8.57	0	0	5.292	2.795	1.531	0	0	5.158	3.411
P199	43	2	2	1	1	2	Chemotherapy	3.8	1	1.169	0.083	0.5	0.167	0.501	0	0	0	1.085	0.083
P200	64	2	2	1	1	1	EGFR-TKIs	2.9	1	1.504	0	0.5	0	5.263	0	0	0	1.504	0
P201	69	1	2	2	1	2	Chemotherapy	3	1	13.689	0.494	1	3.815	2.828	2.873	0	0.09	6.149	7.54
P202	67	1	2	1	1	2	Chemotherapy	2.86667	1	0.66	0.461	0	0.012	0.174	0	0	0	0.66	0
P203	68	1	2	1	1	2	Chemotherapy	2.96667	1	0.853	0.075	20	0	0.754	0	0	0.012	0.841	0.012
P204	39	2	2	1	1	2	Chemotherapy	2.26667	1	7.496	0.331	0.5	0	13.406	0	0	0	7.47	0.026
P205	81	1	2	1	1	2	Chemotherapy	16.4667	1	1.953	0.651	0	0.693	0.111	0.291	0.208	0	1.939	0.014
P206	65	1	2	1	1	2	Chemotherapy	2.83333	1	2.076	2.748	50	0.122	0.427	0.031	0	0	2.076	0
P207	50	2	2	1	1	2	Chemotherapy	7.4	1	33.294	0.415	0.5	0	1.602	0	0	0	26.647	6.647
P208	81	1	2	1	1	2	Chemotherapy	2.23333	1	9.228	1.382	0.5	2.825	2.122	1.209	0.037	0	6.464	2.763
P209	62	1	2	1	1	2	Chemotherapy	2.23333	1	18.224	0.935	0	0.467	0.467	0	0	0	18.224	0
P210	61	1	2	1	1	2	Chemotherapy	2.3	1	9.053	1.679	0.5	0.837	3.394	0.202	0.015	0.525	5.553	3.5
P211	56	2	2	1	1	1	EGFR-TKIs	2.4	1	1.26	0.007	0.5	0.018	0.697	0	0	0	1.239	0.021
P212	37	1	1	2	1	2	Chemotherapy	2.46667	1	0.229	0	0.5	0.007	3.845	0	0	0	0.229	0
P213	69	1	1	2	1	2	Chemotherapy	2.76667	1	15.862	0.645	0.5	0.154	2.618	0.06	0	0.159	15.852	0.01
P214	70	1	2	1	1	1	EGFR-TKIs	2.16667	1	11.461	1.146	50	2.006	0.573	0.287	0	0	11.461	0
P215	78	1	1	2	1	2	Chemotherapy	13.1667	1	3.52	0.292	1	0.184	0.941	0.007	0	0.046	1.784	1.735
P216	50	2	2	1	1	1	EGFR-TKIs	2.46667	1	2.711	0.104	0	1.882	3.042	0.308	0	0.009	2.58	0.131
P217	48	1	2	1	3	2	Surgery	76.4667	1	0.346	0.005	0.5	0.009	1.055	0.005	0	0.005	0.346	0
P218	58	1	2	1	1	2	Chemotherapy	2.5	1	15.654	0.36	90	14.749	2.275	3.361	0.011	0.022	14.307	1.348
P219	56	1	2	1	1	2	Chemotherapy	9.4	1	15.722	0.129	100	4.073	0.968	3.171	0	0	12.623	3.099
P220	67	1	1	2	1	2	Chemotherapy	2.23333	1	18.138	3.543	0.5	2.543	4.934	0.184	0.024	0.944	17.354	0.784
P221	49	1	2	1	1	1	EGFR-TKIs	2	1	2.9	4.054	0.5	1.598	0.474	0.118	0.207	0.03	2.131	0.769
P222	42	2	2	1	1	1	EGFR-TKIs	1.96667	1	1.385	2.526	0	1.711	0	0	0	0	1.304	0.081
P223	75	1	2	1	1	1	EGFR-TKIs	25.7667	1	2.771	0.009	40	0.278	0.886	0.026	0	0	2.727	0.043
P224	70	1	2	1	1	2	Chemotherapy	1.56667	1	1.19	0.054	0.5	0.054	0.255	0	0	0	1.159	0.031
P225	53	1	2	1	1	2	Chemotherapy	1.86667	1	3.033	2.137	0.5	8.083	0.364	1.615	0.075	0.009	3.024	0.009
P226	71	1	1	1	3	2	Surgery	63.6667	1	1.685	0.607	0	0.225	0.292	0	0.007	0	1.655	0.03
P227	47	1	1	2	1	2	Chemotherapy	1.73333	1	3.795	0.234	95	1.08	14.925	0.211	0	0	3.083	0.712
P228	45	1	1	1	1	1	EGFR-TKIs	1.33333	1	2.466	0.043	1	0.107	0.77	0.005	0	0	2.364	0.102
P229	74	1	1	2	1	2	Chemotherapy	7.83333	1	2.35	0.376	95	0.094	0.188	0	0	0	0.188	2.162
P230	48	1	2	1	1	1	EGFR-TKIs	1.06667	1	3.511	0.097	10	0.167	1.777	0.014	0	0	3.026	0.486
P231	52	2	2	1	1	2	Chemotherapy	1.3	1	17.71	0.452	0	6.308	1.238	3.237	0	0	17.662	0.048
P232	61	1	2	2	1	2	Chemotherapy	1.23333	1	10.213	0.112	50	0	3.367	0	0	0	8.305	1.908
P233	54	1	2	1	1	2	Chemotherapy	1.36667	1	5.723	7.497	100	0.806	0.605	0.202	0	0.121	2.701	3.023
P234	52	1	1	1	1	2	Chemotherapy	6.66667	1	0.929	1.818	95	0.013	0.398	0	0	0	0.69	0.239
P235	57	1	2	2	1	2	Chemotherapy	2.03333	1	4.489	2.694	10	2.02	0.393	0	0.112	0	3.76	0.73
P236	56	1	1	2	1	2	Chemotherapy	1.76667	1	3.096	1.694	0.5	1.189	0.585	0.058	0.018	0.115	1.734	1.362
P237	56	1	2	1	1	2	Chemotherapy	13.9	1	6.556	2.201	0	0.074	0.631	0	0.009	0.009	6.547	0.009
P238	70	2	1	2	1	2	Chemotherapy	10.8	1	1.751	0.396	1	0.124	0.724	0.006	0.006	0	1.683	0.068
P239	63	2	2	1	1	2	Chemotherapy	10.4333	1	0.708	0.286	0.5	0.009	3.642	0.004	0	0.004	0.648	0.06
P240	72	1	2	1	3	2	Surgery	33.3333	1	14.576	2.465	0.9	1.636	1.756	0.336	0.037	0.336	13.044	1.532
P241	64	1	2	1	1	1	EGFR-TKIs	12.1667	1	9.406	18.173	90	19.789	2.073	4.786	2.971	0.735	4.03	5.376
P242	51	2	2	2	1	2	Chemotherapy	15.5667	1	29.771	0.305	0	1.679	0	1.527	0	0	28.855	0.916
P243	61	2	2	1	1	2	Chemotherapy	16.9667	1	4.986	3.009	7.6	3.888	0.022	0.22	0.044	0	3.822	1.164
P244	56	1	2	1	1	2	Chemotherapy	11.7	1	11.872	2.413	20	1.42	0.752	0.193	0.042	0.439	9.513	2.359
P245	42	2	2	1	1	1	EGFR-TKIs	10.8667	1	0.009	0.174	0	0	6.71	0	0	0.174	0.009	0
P246	50	1	1	2	1	2	Chemotherapy	28.3667	1	6.018	0.031	0	0.027	0.216	0	0	0.008	6.002	0.015
P247	66	1	2	2	1	2	Chemotherapy	14.3333	1	0.634	1.582	10	1.321	0.194	0.254	0.022	0.06	0.627	0.007
P248	72	1	2	1	1	2	Chemotherapy	25.3667	1	10.895	0.177	95	2.065	5.433	0.051	0	0.023	9.488	1.407
P249	64	1	2	1	1	2	Chemotherapy	24.3333	1	1.883	0.481	0	0.667	1.782	0.034	0.003	0.181	1.776	0.107
P250	53	2	2	2	2	2	Surgery+Chemotherapy	62.8667	1	23.814	0.117	12	4.39	0.142	2.578	0	0.008	19.328	4.486
P251	53	2	2	1	4	1	Surgery	15.7	1	4.227	7.054	0	1.005	2.103	0.136	0.065	1.256	2.899	1.328
P252	58	1	2	1	1	2	Chemotherapy	9.9	1	21.479	7.569	11	3.508	5.975	1.24	0.24	2.007	6.402	15.077
P253	66	1	2	1	1	2	Chemotherapy	14.1333	1	8.064	0.253	0	1.859	2.051	0.113	0	0.105	5.995	2.068
P254	68	1	2	2	1	2	Chemotherapy	9.13333	1	1.599	0.015	0	0.118	0.328	0	0	0	0.646	0.953
P255	43	2	2	1	1	1	EGFR-TKIs	17.8333	1	6.855	0.239	0	2.571	10.417	0.169	0	0.105	6.336	0.52
P256	56	1	1	1	1	2	Chemotherapy	8.8	1	2.561	14.221	90	1.598	10.963	0.307	0.246	7.459	1.988	0.574
P257	65	1	2	1	1	2	Chemotherapy	11.6	1	0.565	1.449	0	0.021	0.634	0	0	0.075	0.512	0.053
P258	58	1	2	1	1	2	Chemotherapy	5.8	1	4.308	0	9	3.061	13.039	1.927	0	0	4.195	0.113
P259	66	2	2	1	3	2	Surgery	35.8333	1	3.27	1.653	2	0.454	1.59	0.027	0	0.454	1.88	1.39
P260	59	1	1	1	1	1	EGFR-TKIs	0.953424	1	5.119	0	0	0.184	0.017	0	0	0	4.634	0.485
P261	69	2	2	1	1	1	EGFR-TKIs	4.96438	1	4.141	4.934	0.529	0.617	1.674	0	0	0.529	0.617	3.524
P262	63	1	1	1	1	1	EGFR-TKIs	14.2356	1	15.573	0.026	0	0.154	0	0.116	0	0	15.161	0.412
P263	66	1	1	1	1	1	EGFR-TKIs	8.12054	1	3.74	3.084	25.066	0	0	0	0	0	1.181	2.559
P264	48	2	2	1	1	1	EGFR-TKIs	0.920547	1	4.022	0.039	0.023	0.012	0.124	0	0	0	1.817	2.205
P265	68	1	2	1	1	1	EGFR-TKIs	24.263	1	9.354	0	0	0	0	0	0	0	7.46	1.894
P266	57	1	2	1	1	1	EGFR-TKIs	11.9671	1	3.561	2.077	0	0	28.783	0	0	2.077	2.671	0.89
P267	61	2	2	1	1	1	EGFR-TKIs	8.18629	1	0.605	0.04	5.804	0	0	0	0	0	0.121	0.484
P268	72	2	2	1	1	1	EGFR-TKIs	8.12054	1	15.141	1.09	10.27	1.725	5.292	0.062	0.011	0.23	3.023	12.119
P269	60	1	1	1	1	1	EGFR-TKIs	13.9068	1	2.343	1.346	0.142	0.293	0.475	0.024	0.008	0.317	1.591	0.752
P270	56	2	2	1	1	1	EGFR-TKIs	11.474	1	5.502	2.632	0.957	0.478	1.196	0	0	0.239	0.239	5.263
P271	68	2	2	1	1	1	EGFR-TKIs	12.1315	1	13.388	0.094	0	0.496	0.142	0.024	0	0	12.184	1.204
P272	58	1	2	1	1	1	EGFR-TKIs	16.1096	1	13.275	27.068	1.48	0.258	3.736	0	0.023	2.397	2.514	10.761
P273	71	2	2	1	1	1	EGFR-TKIs	2.16986	1	0.859	0	0	0	0	0	0	0	0.613	0.245
P274	63	2	2	1	1	1	EGFR-TKIs	17.95	1	2.544	2.586	0.052	2.712	5.377	0.304	0.037	0.393	1.238	1.306
P275	49	2	2	1	1	1	EGFR-TKIs	7.79177	1	7.589	0.922	1.07	6.042	3.072	0.592	0.034	0.353	2.423	5.166
P276	59	2	2	1	1	1	EGFR-TKIs	1.11781	1	6.411	0.88	0.251	0.189	1.006	0	0	0.189	5.971	0.44
P277	59	2	2	1	1	1	EGFR-TKIs	10.2575	1	7.526	1.667	2.468	4.669	3.451	0.507	0.048	0.513	3.408	4.118
P278	52	2	2	1	1	1	EGFR-TKIs	9.23835	1	0.867	0.058	0.058	0.347	0	0.058	0	0	0.173	0.693
P279	68	2	2	1	1	1	EGFR-TKIs	2.01	1	15.825	1.335	0	0.191	12.583	0	0	1.144	11.153	4.671
P280	64	2	2	1	1	1	EGFR-TKIs	12.0329	1	5.894	0.058	0	0.019	0.291	0	0	0	5.487	0.407
P281	52	1	1	1	1	1	EGFR-TKIs	0.953424	1	0.216	0.108	0.036	0	0.108	0	0	0	0.108	0.108
P282	76	1	2	1	1	1	EGFR-TKIs	12.263	1	9.489	0	0	0	0	0	0	0	9.399	0.09
P283	36	1	2	1	1	1	EGFR-TKIs	8.28	1	13.142	0.722	3.466	0.041	1.073	0	0	0	7.53	5.612
P284	51	1	1	1	1	1	EGFR-TKIs	5.98	1	4.972	1.657	0.552	0.552	0	0	0	0	2.762	2.21
P285	56	2	2	1	1	1	EGFR-TKIs	0.88767	1	6.503	0	0	0	0.153	0	0	0	5.815	0.689
P286	45	2	2	1	1	1	EGFR-TKIs	7.85753	1	2.071	3.254	0	0	0	0	0	0	0.592	1.479
P287	76	1	1	1	1	1	EGFR-TKIs	18.115	1	0.098	0	0	0	0.293	0	0	0	0.098	0
P288	65	2	2	1	1	1	EGFR-TKIs	8.48218	1	0.974	0	0	0	9.74	0	0	0	0.974	0
P289	70	2	2	1	1	1	EGFR-TKIs	11.8027	1	1.263	0.202	0	0	0.064	0	0	0	0.849	0.414
P290	57	1	2	1	1	1	EGFR-TKIs	21.01	1	2.363	1.16	0.086	0.236	2.685	0	0	0.086	0.666	1.697
P291	73	2	2	1	2	1	EGFR-TKIs	11.93	1	10.84	6.194	0.339	2.589	5.783	0.073	0.073	1.936	3.629	7.21
P292	40	1	1	1	1	1	EGFR-TKIs	7.56164	1	1.513	1.051	0.294	0.294	0.084	0	0	0	0.168	1.345
P293	65	2	2	1	1	1	EGFR-TKIs	4.34	1	2.347	2.498	2.666	1.974	0.144	0.144	0.012	0.006	0.163	2.185
P294	52	1	1	1	1	1	EGFR-TKIs	2.07123	1	0	0	0	0	0	0	0	0	0	0
P295	67	2	2	1	1	1	EGFR-TKIs	10.0603	1	1.675	6.22	0	0	0	0	0	0	0.239	1.435
P296	61	2	2	1	1	1	EGFR-TKIs	5.12876	1	2.002	0.589	21.319	1.767	0.589	0	0	0	0	2.002
P297	40	2	2	1	1	1	EGFR-TKIs	2.5315	1	0.311	0	0	0	0.778	0	0	0	0.311	0
P298	56	2	2	1	1	1	EGFR-TKIs	21.6	1	2.817	0	1.019	0.34	0.706	0	0	0	2.102	0.715
P299	54	2	2	1	1	1	EGFR-TKIs	8.58081	1	0.57	0.044	3.33	3.067	0	0.044	0	0	0.131	0.438
P300	54	2	2	1	1	1	EGFR-TKIs	8.58081	1	0.328	0.033	0.033	0.164	0	0	0	0	0.164	0.164
P301	42	1	2	1	2	1	Surgery+EGFR-TKIs	4.9	1	8.713	1.073	0.304	3.021	3.28	0.091	0.023	0.068	8.591	0.122
P302	49	1	2	1	1	2	Chemotherapy	2.93333	1	2.031	1.589	0.121	0.237	0.519	0.017	0	0.011	1.782	0.248
P303	68	1	1	1	2	2	Surgery+Chemotherapy	13.0667	1	0.357	0.454	0.049	0	0.054	0	0	0	0.357	0
P304	63	2	2	1	1	1	EGFR-TKIs	20.2333	1	1.296	0.525	0.932	0.477	1.499	0.011	0	0.032	1.124	0.171
P305	37	1	2	1	1	1	EGFR-TKIs	2.93333	1	3.454	5.184	1.469	0.377	1.56	0.029	0.01	0.715	2.589	0.865
P306	61	1	1	1	1	1	EGFR-TKIs	4.1	1	1.181	0.242	0.262	0.008	2.382	0	0	0.121	0.857	0.325
P307	57	1	2	1	1	1	EGFR-TKIs	35.9	1	1.277	1.572	6.581	0.233	1.08	0	0	0.196	0.909	0.368
P308	77	1	1	1	1	2	Chemotherapy	2.4	1	0.054	2.849	0.567	0.594	2.322	0	0.513	0.23	0.027	0.027
P309	46	1	2	1	1	1	EGFR-TKIs	26.2333	1	2.698	3.668	2.606	4.469	0.48	0.505	0.053	0.087	2.242	0.456
P310	56	1	1	1	1	1	EGFR-TKIs	3.26667	1	2.707	1.02	0.405	2.537	1.481	0.139	0.023	0.199	2.295	0.412
P311	39	1	2	2	1	1	EGFR-TKIs	30.7	1	7.1	0.179	3.893	2.913	1.463	0.278	0.003	0.01	6.102	0.998
P312	61	2	2	1	1	1	EGFR-TKIs	3.83333	1	0.775	2.049	0.876	0.591	0.367	0.041	0.01	0.031	0.693	0.082
P313	44	2	2	1	2	1	EGFR-TKIs	22.5	1	7.915	13.963	0.872	1.21	2.223	0.071	0.285	0.125	6.492	1.423
P314	40	2	2	1	1	1	EGFR-TKIs	3.13333	1	4.427	1.236	17.819	0.62	2.771	0.012	0.008	0.279	3.412	1.015
P315	52	2	2	1	1	1	EGFR-TKIs	16.7667	1	2.489	1.449	0.971	3.189	2.582	0.198	0.028	0.26	2.114	0.374
P316	73	2	2	1	1	1	EGFR-TKIs	24.4	1	0.406	1.157	0.132	0.132	0.141	0	0	0.009	0.3	0.106
P317	71	2	2	1	1	1	EGFR-TKIs	5.86667	1	1.011	0.272	0.013	0.194	0.117	0	0	0.013	1.011	0
P318	40	2	2	1	1	1	EGFR-TKIs	7.26667	1	0.229	0.223	0.135	0.135	0.164	0.006	0	0	0.2	0.029
P319	45	1	2	2	2	2	Chemotherapy	33.0333	1	1.895	0.013	63.744	0.053	0.04	0.013	0	0	0.173	1.721
P320	47	2	2	1	4	2	Surgery	31.4667	1	4.695	0.026	0.116	1.177	0.362	0.168	0	0	4.682	0.013
P321	46	2	2	1	1	2	Chemotherapy	13.0667	1	5.972	0	0.144	0	6.991	0	0	0	5.972	0
P322	73	1	2	1	2	1	EGFR-TKIs	13.0667	1	2.925	0.295	1.303	1.647	2.63	0.246	0	0.074	2.753	0.172
P323	45	2	2	1	2	2	Chemotherapy	12.1	1	4.775	0.702	0	0	2.107	0	0	0	4.494	0.281
P324	62	1	2	1	1	2	Chemotherapy	11.7667	1	1.887	0	0	0	0.943	0	0	0	1.887	0
P325	65	2	2	1	1	1	EGFR-TKIs	9.63333	1	3.559	0.055	19.412	0.314	1.396	0	0	0	2.65	0.909
P326	46	2	2	1	1	1	EGFR-TKIs	9.13333	1	2.922	1.434	1.027	0.425	0.407	0	0	0.089	2.763	0.159
P327	62	2	2	1	2	1	EGFR-TKIs	2.7	1	1.919	0	0	0.924	0.675	0.036	0	0	1.919	0
P328	69	2	1	1	1	2	Chemotherapy	7.96667	1	0.45	25.676	23.874	0	0.45	0	0	0.45	0.45	0

## Sheet: Cohort A (123)
PID	CD8+PDL1+ %	TMB	CD8+PDL1+ % Group	Gender	Smoking history	Pathological type	Clinical stage	TP53	EGFR	KRAS	CDKN2A	PTEN	FAT1	KEAP1	NF1	POLE	KMT2C	GRIN2A	KIT	KMT2D	POLD1	FBXW7	KDM5C	CREBBP	BCOR	CUL3	STK11
P63	3.383	10.62	High	Male	Yes	SQCC	IV					Mutated				Mutated		Mutated			Mutated
P103	2.918	0	High	Male	No	ADC	IV			Mutated																Mutated
P95	2.304	0	High	Female	No	ADC	IV		Mutated
P121	2.104	13.97	High	Male	Yes	ADC	IV	Mutated																			Mutated
P91	1.826	5.08	High	Male	Yes	ADC	III	Mutated												Mutated			Mutated			Mutated
P155	1.813	3.84	High	Female	No	ADC	II					Mutated					Mutated		Mutated				Mutated		Mutated
P99	1.706	11.44	High	Male	Yes	ADC	IV	Mutated						Mutated	Mutated				Mutated
P93	1.544	10.17	High	Female	Yes	SQCC	IV	Mutated			Mutated					Mutated
P86	1.528	10.17	High	Male	No	ADC	IV	Mutated			Mutated
P157	1.339	7.64	High	Female	No	ADC	IV	Mutated		Mutated		Mutated			Mutated									Mutated
P115	1.266	10.16	High	Male	Yes	ADC	IV			Mutated				Mutated			Mutated	Mutated
P34	1.043	13.99	High	Male	Yes	ADC	IV	Mutated																			Mutated
P132	0.996	7.62	High	Male	Yes	ADC	II	Mutated	Mutated
P254	0.953	13.96	High	Male	No	SQCC	IV	Mutated						Mutated								Mutated	Mutated
P45	0.87	1.27	High	Female	No	ADC	IV			Mutated
P134	0.821	19.08	High	Male	Yes	SQCC	IV	Mutated					Mutated				Mutated	Mutated		Mutated
P173	0.764	6.36	High	Male	Yes	SQCC	IV	Mutated																Mutated	Mutated
P149	0.742	10.17	High	Male	No	SQCC	IV	Mutated					Mutated			Mutated				Mutated	Mutated
P148	0.741	1.27	High	Male	Yes	ADC	IV
P90	0.662	9	High	Male	No	ADC	IV			Mutated								Mutated
P135	0.651	7.62	High	Male	Yes	ADC	IV			Mutated						Mutated											Mutated
P104	0.645	2.54	High	Male	Yes	ADC	IV	Mutated											Mutated		Mutated
P72	0.642	3.81	High	Male	No	ADC	IV	Mutated		Mutated
P112	0.62	7.62	High	Male	Yes	SQCC	IV	Mutated			Mutated		Mutated	Mutated					Mutated			Mutated
P136	0.595	8.9	High	Male	Yes	SQCC	IV	Mutated							Mutated						Mutated					Mutated
P153	0.569	2.54	High	Female	No	ADC	III	Mutated		Mutated
P171	0.568	29.24	High	Male	Yes	SQCC	IV	Mutated			Mutated				Mutated	Mutated		Mutated				Mutated		Mutated	Mutated
P129	0.538	0	High	Female	No	ADC	III
P140	0.506	12.73	High	Male	Yes	SQCC	IV	Mutated												Mutated
P47	0.478	11.43	High	Female	No	ADC	III	Mutated	Mutated	Mutated		Mutated									Mutated
P125	0.461	0	High	Male	No	ADC	I		Mutated
P147	0.413	2.54	Low	Female	No	ADC	III	Mutated	Mutated			Mutated				Mutated
P113	0.411	8.9	Low	Male	Yes	SQCC	II	Mutated												Mutated
P124	0.398	5.08	Low	Male	No	ADC	III	Mutated	Mutated
P159	0.396	2.54	Low	Female	No	ADC	III		Mutated																Mutated
P97	0.391	2.54	Low	Female	Yes	ADC	I
P165	0.323	20.4	Low	Male	No	ADC	IV	Mutated												Mutated
P82	0.306	7.61	Low	Female	No	ADC	I	Mutated
P123	0.27	12.71	Low	Male	Yes	SQCC	IV	Mutated	Mutated																	Mutated
P151	0.262	2.53	Low	Male	No	ADC	IV		Mutated
P117	0.259	6.35	Low	Male	Yes	SQCC	IV	Mutated
P111	0.25	1.27	Low	Female	No	ADC	IV		Mutated			Mutated
P163	0.227	1.27	Low	Female	No	ADC	III	Mutated				Mutated
P166	0.225	3.83	Low	Male	Yes	ADC	IV	Mutated	Mutated
P73	0.215	7.62	Low	Male	Yes	ADC	IV	Mutated	Mutated									Mutated
P127	0.197	6.35	Low	Male	Yes	SQCC	IV	Mutated
P76	0.173	0	Low	Male	Yes	ADC	I			Mutated
P158	0.134	3.81	Low	Female	Yes	ADC	IV		Mutated
P59	0.133	3.81	Low	Male	Yes	ADC	IV	Mutated					Mutated
P98	0.127	8.89	Low	Male	Yes	SQCC	IV	Mutated					Mutated
P162	0.126	0	Low	Female	Yes	ADC	IV		Mutated
P128	0.122	0	Low	Male	Yes	ADC	I		Mutated
P160	0.119	7.62	Low	Male	Yes	SQCC	IV	Mutated				Mutated		Mutated								Mutated
P145	0.109	0	Low	Male	Yes	ADC	III
P64	0.107	5.07	Low	Male	Yes	ADC	IV	Mutated	Mutated							Mutated					Mutated
P109	0.106	5.08	Low	Male	Yes	ADC	IV			Mutated
P169	0.104	1.29	Low	Male	Yes	ADC	IV	Mutated	Mutated
P77	0.092	1.27	Low	Male	No	ADC	II		Mutated
P137	0.091	5.08	Low	Male	Yes	SQCC	IV	Mutated											Mutated
P102	0.085	1.27	Low	Male	No	ADC	IV	Mutated
P143	0.083	0	Low	Female	No	ADC	IV			Mutated
P101	0.082	2.54	Low	Female	No	ADC	II		Mutated
P130	0.077	2.54	Low	Male	Yes	SQCC	IV	Mutated			Mutated
P79	0.073	2.55	Low	Female	No	ADC	IV		Mutated
P89	0.067	2.55	Low	Male	Yes	ADC	II								Mutated
P106	0.064	0	Low	Female	No	ADC	IV		Mutated
P154	0.061	5.08	Low	Female	No	ADC	II		Mutated
P172	0.056	6.37	Low	Male	Yes	ADC	IV	Mutated
P92	0.054	7.67	Low	Female	No	ADC	III	Mutated	Mutated														Mutated
P50	0.04	6.36	Low	Male	Yes	ADC	III	Mutated	Mutated			Mutated				Mutated					Mutated
P53	0.036	1.27	Low	Female	No	ADC	III		Mutated
P42	0.031	10.29	Low	Male	No	ADC	III	Mutated	Mutated							Mutated
P152	0.031	3.81	Low	Male	Yes	ADC	IV	Mutated	Mutated
P139	0.028	1.27	Low	Female	No	ADC	II		Mutated
P56	0.027	19.05	Low	Male	Yes	ADC	II	Mutated									Mutated						Mutated
P108	0.024	1.27	Low	Male	Yes	ADC	IV	Mutated
P60	0.017	30.53	Low	Male	Yes	ADC	IV	Mutated			Mutated		Mutated				Mutated		Mutated
P126	0.016	2.54	Low	Female	No	ADC	IV	Mutated	Mutated			Mutated		Mutated
P78	0.015	11.43	Low	Male	Yes	ADC	III	Mutated		Mutated	Mutated
P62	0.014	6.35	Low	Female	No	ADC	III		Mutated
P66	0.014	7.62	Low	Male	No	ADC	III	Mutated	Mutated
P37	0.01	8.02	Low	Male	Yes	ADC	IV		Mutated											Mutated
P85	0.01	5.1	Low	Male	Yes	ADC	IV	Mutated	Mutated									Mutated				Mutated
P168	0.01	6.37	Low	Male	Yes	SQCC	IV	Mutated
P87	0.005	5.09	Low	Male	Yes	ADC	II	Mutated		Mutated																Mutated	Mutated
P167	0.004	11.67	Low	Male	Yes	ADC	I	Mutated	Mutated	Mutated					Mutated		Mutated
P16	0	10.1	Low	Female	Yes	ADC	III			Mutated	Mutated
P36	0	3.81	Low	Female	No	ADC	IV	Mutated	Mutated
P39	0	15.28	Low	Male	Yes	SQCC	II	Mutated			Mutated		Mutated				Mutated			Mutated		Mutated
P40	0	13.96	Low	Female	No	ADC	IV	Mutated	Mutated									Mutated
P48	0	1.26	Low	Female	No	ADC	IV		Mutated
P51	0	2.54	Low	Female	No	ADC	IV	Mutated	Mutated
P52	0	10.16	Low	Male	No	ADC	IV	Mutated		Mutated			Mutated											Mutated
P54	0	1.26	Low	Male	No	ADC	II								Mutated
P65	0	3.84	Low	Female	Yes	ADC	III	Mutated							Mutated
P68	0	10.17	Low	Female	No	ADC	II		Mutated																Mutated
P75	0	1.27	Low	Male	Yes	SQCC	IV	Mutated
P80	0	17.82	Low	Male	Yes	ADC	IV						Mutated	Mutated			Mutated
P81	0	1.27	Low	Male	No	ADC	I		Mutated										Mutated
P84	0	2.54	Low	Female	No	ADC	IV		Mutated
P88	0	1.27	Low	Male	Yes	ADC	IV		Mutated
P94	0	6.37	Low	Male	Yes	ADC	IV	Mutated			Mutated
P96	0	3.82	Low	Male	Yes	ADC	III	Mutated	Mutated
P100	0	11.45	Low	Male	Yes	ADC	I			Mutated				Mutated
P105	0	7.64	Low	Male	Yes	ADC	I			Mutated						Mutated
P107	0	19.06	Low	Male	Yes	SQCC	IV	Mutated	Mutated															Mutated
P110	0	0	Low	Male	Yes	ADC	IV			Mutated				Mutated
P114	0	5.08	Low	Male	Yes	SQCC	I	Mutated
P116	0	8.88	Low	Female	No	ADC	IV	Mutated	Mutated
P118	0	40.96	Low	Male	Yes	ADC	IV	Mutated			Mutated		Mutated		Mutated		Mutated						Mutated	Mutated
P119	0	0	Low	Female	No	ADC	III					Mutated
P120	0	5.08	Low	Female	No	ADC	III	Mutated	Mutated
P122	0	5.09	Low	Male	Yes	ADC	IV			Mutated	Mutated			Mutated													Mutated
P131	0	1.27	Low	Male	Yes	SQCC	IV	Mutated			Mutated								Mutated
P133	0	5.09	Low	Female	No	ADC	IV	Mutated	Mutated						Mutated						Mutated
P138	0	0	Low	Male	No	ADC	I
P141	0	2.54	Low	Male	Yes	ADC	I
P142	0	7.62	Low	Male	No	SQCC	IV	Mutated
P146	0	0	Low	Female	No	ADC	IV		Mutated
P150	0	0	Low	Male	Yes	ADC	IV	Mutated														Mutated
P156	0	8.89	Low	Male	Yes	SQCC	IV	Mutated			Mutated												Mutated
P164	0	1.27	Low	Female	Yes	ADC	IV		Mutated
P170	0	5.08	Low	Female	No	ADC	III	Mutated	Mutated

## Sheet: Cohort B (50)
PID	Age	Gender	Smoking history	Pathological type	Clinical stage	EGFR	Intervention	Objective response	PFS (Months)	PFS status	CD8+PDL1+ %	PD-L1 TC	CD8 %	CD8 %	TMB	POLE	POLD1
P1	68	Male	Yes	ADC	IV	Wild type	Anti-PD1	CR	20	1	2.143	<1%	4.742	M	H	wt	wt
P10	65	Male	Yes	ADC	III	Wild type	Anti-PD1+Chemo	PR	22	1	0.372	<1%	23.507	H	ne	nd	nd
P11	58	Male	No	ADC	III	Wild type	Anti-PD1+Chemo	PR	8	1	0	1-49%	9.867	H	ne	nd	nd
P12	62	Male	Yes	ADC	IV	Wild type	Anti-PD1+Chemo	SD	7	1	0.093	<1%	1.441	M	ne	nd	nd
P13	58	Male	Yes	SQCC	IV	Wild type	Anti-PD1+Chemo	PD	6	1	0.166	<1%	30.96	H	ne	nd	nd
P14	65	Male	Yes	ADC	IV	Wild type	Anti-PD1+Chemo	PD	2	1	0	1-49%	5.319	M	ne	nd	nd
P15	78	Female	No	ADC	IV	Wild type	Anti-PD1+Chemo	SD	3	1	0	<1%	0.168	L	ne	nd	nd
P16	69	Male	Yes	SQCC	IV	Wild type	Anti-PD1	PR	7	1	0	<1%	36	H	ne	nd	nd
P17	70	Male	Yes	ADC	IV	Wild type	Anti-PD1	PD	5	1	0	<1%	0	L	ne	nd	nd
P18	65	Male	Yes	SQCC	III	Wild type	Anti-PD1+Chemo	PR	5	1	0	<1%	11.621	H	ne	nd	nd
P19	55	Male	No	ADC	IV	Wild type	Anti-PD1	PD	7	1	0	<1%	0.51	M	ne	nd	nd
P2	58	Male	No	ADC	IV	Wild type	Anti-PD1+Chemo	PD	3	1	1.314	1-49%	2.409	M	L	wt	wt
P20	48	Male	Yes	ADC	IV	Wild type	Anti-PD1+Chemo	PD	7	1	4.55	>=50%	10.291	H	ne	nd	nd
P21	41	Female	No	SQCC	III	Wild type	Anti-PD1+Chemo	PD	8	1	0.049	<1%	0.343	L	ne	nd	nd
P22	47	Male	Yes	SQCC	III	Wild type	Anti-PD1+Chemo	SD	5	1	0.283	>=50%	0.344	L	ne	nd	nd
P23	64	Male	Yes	SQCC	III	Wild type	Anti-PD1+Chemo	PR	9	1	0.166	<1%	2.681	M	ne	nd	nd
P24	63	Male	Yes	SQCC	III	Wild type	Anti-PD1+Chemo	PR	8	1	1.345	<1%	5.997	H	ne	nd	nd
P25	54	Male	Yes	SQCC	IV	Wild type	Anti-PD1+Chemo	SD	16	1	0	<1%	0	L	ne	nd	nd
P26	69	Male	Missing	SQCC	IV	Wild type	Anti-PD1+Chemo	PR	12	1	2.167	>=50%	4.697	M	H	mut	mut
P27	62	Male	Missing	SQCC	IV	Wild type	Anti-PD1	PR	9	1	1.032	>=50%	2.54	M	M	wt	wt
P28	61	Male	Missing	SQCC	IV	Wild type	Anti-PD1+Chemo	PR	5	1	0.086	>=50%	0.146	L	L	wt	wt
P29	55	Male	Missing	SQCC	IV	Wild type	Anti-PD1	SD	10	1	0.578	>=50%	1.026	M	L	wt	wt
P3	64	Male	Yes	ADC	IV	Wild type	Anti-PD1+Chemo	SD	6	1	0	1-49%	2.519	M	ne	nd	nd
P30	64	Male	Missing	SQCC	IV	Wild type	Anti-PD1	PR	5	1	0	>=50%	0	L	H	wt	wt
P31	64	Female	Missing	SQCC	IV	Wild type	Anti-PD1	PD	6	1	0.068	1-49%	0.437	L	L	wt	wt
P32	55	Male	Missing	SQCC	IV	Wild type	Anti-PD1	PD	4	1	0.01	>=50%	4.263	M	H	wt	wt
P33	60	Male	Missing	SQCC	IV	Wild type	Anti-PD1+Chemo	PR	10	1	1.235	1-49%	2.35	M	L	wt	wt
P34	49	Male	Missing	SQCC	IV	Wild type	Anti-PD1+Chemo	PR	6	1	0.012	<1%	0.023	L	L	wt	wt
P35	65	Male	Missing	SQCC	IV	Wild type	Anti-PD1	PD	5	1	0.005	>=50%	0.069	L	L	wt	wt
P36	64	Male	No	ADC	IV	Wild type	Anti-PD1+Chemo	PR	10	1	1.282	>=50%	2.037	M	ne	nd	nd
P37	51	Female	No	ADC	IV	Wild type	Anti-PD1+Chemo	PR	14	1	0.074	>=50%	0.418	L	ne	nd	nd
P38	54	Male	Yes	ADC	IV	Wild type	Anti-PD1+Chemo	PD	4	1	0	1-49%	1.402	M	M	wt	wt
P39	68	Male	Yes	SQCC	III	Wild type	Anti-PD1+Chemo	PR	6	1	0.144	>=50%	1.085	M	H	wt	wt
P4	47	Male	No	SQCC	III	Wild type	Anti-PD1+Chemo	PD	7	1	0	<1%	2.412	M	ne	nd	nd
P40	65	Male	No	SQCC	IV	Wild type	Anti-PD1	PR	15	1	4.564	>=50%	6.722	H	H	wt	mut
P41	63	Male	Yes	ADC	IV	Wild type	Anti-PD1	SD	4	1	0	1-49%	1.031	M	H	wt	wt
P42	60	Male	Yes	ADC	IV	Wild type	Anti-PD1+Chemo	PR	9	1	1.25	>=50%	6.25	H	M	wt	wt
P43	56	Female	No	ADC	IV	Wild type	Anti-PD1	PR	5	1	1.313	>=50%	3.33	M	L	wt	wt
P44	77	Male	Yes	ADC	III	Wild type	Anti-PD1+Chemo	SD	16	1	0.176	1-49%	5.08	M	M	wt	wt
P45	52	Male	Yes	ADC	III	Wild type	Anti-PD1+Chemo	PR	7	1	0.794	>=50%	3.14	M	M	wt	wt
P46	68	Male	Yes	SQCC	IV	Wild type	Anti-PD1+Chemo	PR	8	1	0.134	<1%	0.267	L	L	wt	wt
P47	73	Male	Yes	ADC	II	Wild type	Anti-PD1	PR	10	1	3.739	>=50%	5.752	M	M	wt	mut
P48	66	Male	Yes	ADC	III	Wild type	Anti-PD1+Chemo	SD	5	1	0.573	>=50%	6.16	H	L	wt	wt
P49	72	Male	Yes	SQCC	IV	Wild type	Anti-PD1+Chemo	SD	4	1	0.433	1-49%	1.882	M	L	wt	wt
P5	55	Male	No	ADC	III	Wild type	Anti-PD1+Chemo	SD	4	1	0.033	<1%	2.848	M	ne	nd	nd
P50	75	Female	No	SQCC	III	Wild type	Anti-PD1+Chemo	SD	28	1	3.158	>=50%	9.607	H	L	mut	wt
P6	60	Male	Yes	ADC	IV	Wild type	Anti-PD1+Chemo	PD	8	1	0.075	<1%	1.124	M	ne	nd	nd
P7	64	Male	Yes	ADC	II	Wild type	Anti-PD1+Chemo	SD	20	1	0.126	<1%	8.143	H	ne	nd	nd
P8	50	Male	Yes	SQCC	IV	Wild type	Anti-PD1+Chemo	SD	8	1	0.181	>=50%	2.252	M	ne	nd	nd
P9	57	Male	Yes	ADC	IV	Wild type	Anti-PD1+Chemo	PD	11	1	0.158	<1%	1.352	M	ne	nd	nd
